# Supplementary material for: Preferred and avoided codon pairs in three domains of life
Source: PubMed Central journal article supplement (PMC2585594; doi:10.1186/1471-2164-9-463), 2008-10-08
Supplement: 1471-2164-9-463-S2.pdf [file 1471-2164-9-463-S2.pdf]

| 1..2↑<br>codon<br>pairs | %  | 6mers, log <sub>2</sub> (obs/exp) |            | A - B | z-score, ORFeome |         |      |        |      |         |      |        | type |                |
|-------------------------|----|-----------------------------------|------------|-------|------------------|---------|------|--------|------|---------|------|--------|------|----------------|
|                         |    | ORFeome<br>(A)                    | genome (B) |       | 6mers            | 5mers   |      | 4mers  |      | 3mers   |      | 2mers  |      |                |
| CUUGAA                  | 53 | 0.33                              | 0.34       | -0.01 | 1.05             | CUUGnA  | 1.10 | CUUGnn | 1.24 | nnUGnA  | 1.17 | nnUGnn | 1.26 |                |
| CCUGAA                  | 53 | 0.32                              | 0.65       | -0.33 | 0.98             | CCUGnA  | 1.44 | nCUGnA | 1.98 | nCUnnA  | 2.13 | nnUGnn | 1.26 |                |
| GCUGCU                  | 53 | 0.53                              | 0.68       | -0.15 | 1.67             | nCUGCU  | 2.44 | nCUnCU | 3.29 | nnUnCU  | 2.47 | nnUnCn | 2.07 | 4 <sub>p</sub> |
| AUCACC                  | 53 | 0.28                              | 0.56       | -0.28 | 0.88             | AUCAnC  | 1.34 | nUCAnC | 1.90 | nnCAnC  | 2.13 | nnCAnn | 2.07 | 2 <sub>p</sub> |
| GCAAGA                  | 52 | 0.82                              | 0.26       | 0.56  | 2.73             | nCAAGA  | 4.41 | nCAnGA | 3.94 | nnAAnA  | 3.45 | nnAnnA | 2.46 |                |
| UUGCUU                  | 52 | 0.50                              | 0.04       | 0.46  | 1.58             | UUGCUn  | 2.07 | nnGCUU | 2.66 | nnGCUn  | 3.96 | nnGCnn | 4.31 | 1 <sub>p</sub> |
| GUUGCU                  | 52 | 0.43                              | 0.24       | 0.18  | 1.34             | GUUnCU  | 1.85 | nUUnCU | 2.05 | nnUnCU  | 2.47 | nnUnCn | 2.07 | 4 <sub>p</sub> |
| CUUGAU                  | 52 | 0.37                              | 0.46       | -0.09 | 1.18             | CUUGnU  | 1.15 | CUUGnn | 1.24 | nnUGnU  | 1.17 | nnUGnn | 1.26 |                |
| GUAUUU                  | 52 | 0.49                              | 0.41       | 0.07  | 1.55             | nUAUUU  | 1.98 | nUAUUn | 2.05 | nUAUnn  | 2.47 | nnAUUn | 1.06 |                |
| GAUGCC                  | 52 | 0.25                              | 0.18       | 0.07  | 0.81             | nAUGCC  | 1.25 | nnUGCC | 1.69 | nnUGCn  | 1.65 | nnUnCn | 2.07 | 4 <sub>p</sub> |
| UUGCUG                  | 52 | 0.56                              | 0.60       | -0.04 | 1.81             | UUGCUn  | 2.07 | nnGCUG | 2.72 | nnGCUn  | 3.96 | nnGCnn | 4.31 | 1 <sub>p</sub> |
| AUCAAC                  | 52 | 0.30                              | 0.42       | -0.12 | 0.95             | nUCAAC  | 1.39 | nUCAnC | 1.90 | nnCAnC  | 2.13 | nnCAnn | 2.07 | 2 <sub>p</sub> |
| GUGAUG                  | 52 | 0.39                              | 0.93       | -0.54 | 1.21             | GUGnUG  | 1.49 | GnGnUG | 1.61 | nnGnUG  | 1.77 | nnGnUn | 1.87 |                |
| GCAAGG                  | 51 | 0.78                              | 0.28       | 0.49  | 2.45             | nCAAGG  | 3.27 | nCAAGn | 2.66 | nnAAGn  | 3.24 | nnAAnn | 1.26 |                |
| AGUGAA                  | 51 | 0.35                              | 0.23       | 0.12  | 1.12             | AGUGnA  | 1.15 | AGUnnA | 1.16 | nnUGnA  | 1.17 | nnUGnn | 1.26 |                |
| CCUUCU                  | 51 | 0.98                              | 0.69       | 0.29  | 3.32             | nCUUCU  | 4.14 | nCUUCn | 3.82 | nnUUCn  | 3.86 | nnUUnn | 2.84 | 3 <sub>p</sub> |
| GCUUCA                  | 51 | 0.69                              | 0.44       | 0.24  | 2.23             | nCUUCA  | 4.08 | nCUUnA | 3.99 | nnUUnA  | 4.06 | nnUUnn | 2.84 | 3 <sub>p</sub> |
| ACCAAU                  | 51 | 0.33                              | 0.09       | 0.24  | 1.05             | nCCA AU | 1.67 | nCCAnU | 1.61 | nnCAAn  | 1.77 | nnCAnn | 2.07 | 2 <sub>p</sub> |
| GCGCUU                  | 51 | 0.41                              | 0.19       | 0.22  | 1.28             | GnGCUU  | 2.28 | nCGCUn | 3.17 | nnGCUn  | 3.96 | nnGCnn | 4.31 | 1 <sub>p</sub> |
| GAUGUG                  | 51 | 0.21                              | 0.02       | 0.20  | 0.70             | nAUGUG  | 0.74 | nAUGUn | 0.68 | GnUGnn  | 0.79 | nnUGnn | 1.26 |                |
| CUGCAA                  | 51 | 0.51                              | 0.34       | 0.17  | 1.61             | CnGCAA  | 1.72 | CnGCnA | 2.25 | CnGCnn  | 3.13 | nnGCnn | 4.31 | 1 <sub>p</sub> |
| AAAACA                  | 51 | 0.46                              | 0.44       | 0.02  | 1.46             | AnAACA  | 2.44 | nnAACA | 2.92 | nnAAnA  | 3.45 | nnAnnA | 2.46 |                |
| AUUUUA                  | 51 | 0.60                              | 0.65       | -0.05 | 1.92             | nUUUUA  | 3.05 | nUUUnA | 3.53 | nnUUUnA | 4.06 | nnUUnn | 2.84 |                |
| GAGCAA                  | 51 | 0.33                              | 0.38       | -0.05 | 1.05             | GAGCnA  | 1.67 | GAGCnn | 2.52 | GnGCnn  | 3.66 | nnGCnn | 4.31 | 1 <sub>p</sub> |
| GUGCUG                  | 51 | 0.51                              | 0.75       | -0.24 | 1.64             | GnGCUG  | 2.15 | GnGCUn | 2.98 | nnGCUn  | 3.96 | nnGCnn | 4.31 | 1 <sub>p</sub> |
