# Supplementary material for: Preferred and avoided codon pairs in three domains of life
Source: PubMed Central journal article supplement (PMC2585594; doi:10.1186/1471-2164-9-463), 2008-10-08
Supplement: 1471-2164-9-463-S4.pdf [file 1471-2164-9-463-S4.pdf]

type 1 nnUAnn

| 1..2↓<br>codon<br>pairs | strand | %  | 6mers, log <sub>2</sub> (obs/exp) |               | A - B | z-score, ORFeome |         |       |         |       |         |       |        |       |
|-------------------------|--------|----|-----------------------------------|---------------|-------|------------------|---------|-------|---------|-------|---------|-------|--------|-------|
|                         |        |    | ORFeome<br>(A)                    | genome<br>(B) |       | 6mers            | 5mers   |       | 4mers   |       | 3mers   |       | 2mers  |       |
| ACUACG                  | ↑      | 53 | -0.60                             | 0.14          | -0.74 | -1.70            | ACUAnG  | -2.69 | nCUAnG  | -3.95 | nCUAnn  | -4.45 | nnUAnn | -5.11 |
| CGUAGA                  | ↓      | 51 | -0.71                             | -0.04         | -0.68 | -2.03            | CGUAGn  | -2.98 | CnUAGn  | -4.23 | nnUAGn  | -5.42 | nnUAnn | -5.11 |
| CGUAGG                  | ↓      | 51 | -1.06                             | -0.40         | -0.66 | -3.12            | CnUAGG  | -2.98 | CnUAGn  | -4.23 | nnUAGn  | -5.42 | nnUAnn | -5.11 |
| AUUAUU                  | ↑      | 64 | -0.49                             | 0.12          | -0.61 | -1.40            | AUUAAn  | -2.50 | nUUAAAn | -3.41 | nUUAnn  | -4.26 | nnUAnn | -5.11 |
| UAUAAU                  | ↓      | 58 | -0.45                             | 0.11          | -0.57 | -1.28            | UAUAAAn | -1.73 | UnUAAAn | -2.55 | nnUAAAn | -3.90 | nnUAnn | -5.11 |
| UUUAGC                  | ↑      | 62 | -0.74                             | -0.17         | -0.57 | -2.17            | nUUAGC  | -3.49 | nUUAGn  | -4.23 | nnUAGn  | -5.42 | nnUAnn | -5.11 |
| AUUUAU                  | ↑      | 52 | -0.45                             | 0.11          | -0.56 | -1.28            | AUUAnA  | -1.81 | AUUAnn  | -2.79 | nUUAnn  | -4.26 | nnUAnn | -5.11 |
| AUUAGC                  | ↑      | 68 | -0.84                             | -0.30         | -0.54 | -2.47            | nUUAGC  | -3.49 | nUUAGn  | -4.23 | nnUAGn  | -5.42 | nnUAnn | -5.11 |
| UAUAGU                  | ↓      | 58 | -0.67                             | -0.13         | -0.53 | -1.90            | UAUAGn  | -2.78 | UnUAGn  | -3.68 | nnUAGn  | -5.42 | nnUAnn | -5.11 |
| AUUAAC                  | ↑      | 59 | -0.62                             | -0.10         | -0.52 | -1.77            | AUUAAn  | -2.50 | nUUAAAn | -3.41 | nUUAnn  | -4.26 | nnUAnn | -5.11 |
| ACUAUG                  | ↑      | 73 | -0.71                             | -0.21         | -0.50 | -2.10            | nCUAUG  | -2.98 | nCUAnG  | -3.95 | nCUAnn  | -4.45 | nnUAnn | -5.11 |
| UAUAGA                  | ↓      | 57 | -0.67                             | -0.17         | -0.49 | -1.83            | UAUAGn  | -2.78 | UnUAGn  | -3.68 | nnUAGn  | -5.42 | nnUAnn | -5.11 |
| GCUAUG                  | ↑      | 76 | -0.76                             | -0.28         | -0.48 | -2.25            | nCUAUG  | -2.98 | nCUAnG  | -3.95 | nCUAnn  | -4.45 | nnUAnn | -5.11 |
| AUUAAA                  | ↑      | 64 | -0.43                             | 0.03          | -0.46 | -1.17            | AUUAAn  | -2.50 | nUUAAAn | -3.41 | nUUAnn  | -4.26 | nnUAnn | -5.11 |
| AUUACG                  | ↑      | 54 | -0.47                             | -0.02         | -0.45 | -1.34            | nUUACG  | -2.32 | nUUAnG  | -3.55 | nUUAnn  | -4.26 | nnUAnn | -5.11 |
| UAUAGG                  | ↓      | 53 | -0.86                             | -0.44         | -0.43 | -2.47            | UAUAGn  | -2.78 | UnUAGn  | -3.68 | nnUAGn  | -5.42 | nnUAnn | -5.11 |
| GUUAUG                  | ↑      | 72 | -0.71                             | -0.30         | -0.41 | -2.03            | GUUAnG  | -2.69 | nUUAnG  | -3.55 | nUUAnn  | -4.26 | nnUAnn | -5.11 |
| GUUAGC                  | ↑      | 73 | -0.92                             | -0.52         | -0.39 | -2.70            | nUUAGC  | -3.49 | nUUAGn  | -4.23 | nnUAGn  | -5.42 | nnUAnn | -5.11 |
| CCUACG                  | ↑      | 54 | -0.76                             | -0.38         | -0.38 | -2.17            | CCUAnG  | -2.78 | nCUAnG  | -3.95 | nCUAnn  | -4.45 | nnUAnn | -5.11 |
| AUUAGU                  | ↑      | 70 | -0.69                             | -0.32         | -0.37 | -2.03            | AUUAGn  | -3.18 | nUUAGn  | -4.23 | nnUAGn  | -5.42 | nnUAnn | -5.11 |
| GUUAGU                  | ↑      | 67 | -0.81                             | -0.46         | -0.36 | -2.39            | GUUAGn  | -3.28 | nUUAGn  | -4.23 | nnUAGn  | -5.42 | nnUAnn | -5.11 |
| UUUAGU                  | ↑      | 64 | -0.56                             | -0.23         | -0.32 | -1.58            | nUUAGU  | -3.18 | nUUAGn  | -4.23 | nnUAGn  | -5.42 | nnUAnn | -5.11 |
| UCUAUG                  | ↑      | 56 | -0.54                             | -0.22         | -0.32 | -1.52            | nCUAUG  | -2.98 | nCUAnG  | -3.95 | nCUAnn  | -4.45 | nnUAnn | -5.11 |
| GCUACG                  | ↑      | 59 | -0.60                             | -0.29         | -0.31 | -1.70            | GCUAnG  | -2.69 | nCUAnG  | -3.95 | nCUAnn  | -4.45 | nnUAnn | -5.11 |
| CUUAUG                  | ↑      | 79 | -0.92                             | -0.63         | -0.29 | -2.70            | CUUAnG  | -3.71 | CUUAnn  | -3.68 | nUUAnn  | -4.26 | nnUAnn | -5.11 |
| CAUAGC                  | ↓      | 53 | -0.56                             | -0.27         | -0.29 | -1.58            | CnUAGC  | -2.98 | CnUAGn  | -4.23 | nnUAGn  | -5.42 | nnUAnn | -5.11 |
| CCUAUG                  | ↑      | 65 | -0.71                             | -0.43         | -0.28 | -2.10            | nCUAUG  | -2.98 | nCUAnG  | -3.95 | nCUAnn  | -4.45 | nnUAnn | -5.11 |
| GUUAAU                  | ↑      | 55 | -0.40                             | -0.13         | -0.27 | -1.11            | GUUAAn  | -2.32 | nUUAAAn | -3.41 | nUUAnn  | -4.26 | nnUAnn | -5.11 |
| CUUACG                  | ↑      | 72 | -0.89                             | -0.63         | -0.26 | -2.62            | CUUAnG  | -3.71 | CUUAnn  | -3.68 | nUUAnn  | -4.26 | nnUAnn | -5.11 |
| GUUAAA                  | ↑      | 62 | -0.42                             | -0.16         | -0.25 | -1.11            | GUUAAn  | -2.32 | nUUAAAn | -3.41 | nUUAnn  | -4.26 | nnUAnn | -5.11 |
| GUUAAC                  | ↑      | 64 | -0.64                             | -0.39         | -0.25 | -1.83            | nUUAAC  | -2.32 | nUUAAAn | -3.41 | nUUAnn  | -4.26 | nnUAnn | -5.11 |
| GUUACG                  | ↑      | 62 | -0.56                             | -0.33         | -0.23 | -1.52            | GUUAnG  | -2.69 | nUUAnG  | -3.55 | nUUAnn  | -4.26 | nnUAnn | -5.11 |
| AUUAGG                  | ↑      | 53 | -0.74                             | -0.52         | -0.22 | -2.10            | AUUAGn  | -3.18 | nUUAGn  | -4.23 | nnUAGn  | -5.42 | nnUAnn | -5.11 |
| ACUAGC                  | ↑      | 65 | -0.89                             | -0.68         | -0.21 | -2.70            | nCUAGC  | -3.82 | nCUAGn  | -4.52 | nnUAGn  | -5.42 | nnUAnn | -5.11 |
| AUUAAG                  | ↑      | 67 | -0.67                             | -0.46         | -0.20 | -1.90            | nUUAAG  | -2.69 | nUUAnG  | -3.55 | nUUAnn  | -4.26 | nnUAnn | -5.11 |
| GCUACC                  | ↑      | 55 | -0.51                             | -0.32         | -0.20 | -1.46            | GCUAnC  | -2.06 | nCUAnC  | -3.03 | nCUAnn  | -4.45 | nnUAnn | -5.11 |
| UAUAGC                  | ↓      | 59 | -0.51                             | -0.35         | -0.16 | -1.46            | UnUAGC  | -2.88 | nnUAGC  | -3.81 | nnUAGn  | -5.42 | nnUAnn | -5.11 |
| GCUAUU                  | ↑      | 51 | -0.47                             | -0.32         | -0.16 | -1.34            | GCUAAn  | -1.81 | GCUAnn  | -2.91 | nCUAnn  | -4.45 | nnUAnn | -5.11 |
| CUUAGC                  | ↑      | 62 | -0.81                             | -0.69         | -0.12 | -2.39            | nUUAGC  | -3.49 | nUUAGn  | -4.23 | nnUAGn  | -5.42 | nnUAnn | -5.11 |
| GCUAUC                  | ↑      | 51 | -0.30                             | -0.19         | -0.11 | -0.84            | GCUAnC  | -2.06 | nCUAnC  | -3.03 | nCUAnn  | -4.45 | nnUAnn | -5.11 |
| CUUAGU                  | ↑      | 73 | -0.94                             | -0.83         | -0.11 | -2.78            | nUUAGU  | -3.18 | nUUAGn  | -4.23 | nnUAGn  | -5.42 | nnUAnn | -5.11 |
| CUUACC                  | ↑      | 59 | -0.47                             | -0.38         | -0.09 | -1.34            | CUUACn  | -2.50 | CUUAnn  | -3.68 | nUUAnn  | -4.26 | nnUAnn | -5.11 |
| ACUAGU                  | ↑      | 51 | -0.79                             | -0.70         | -0.09 | -2.25            | ACUAGn  | -3.38 | nCUAGn  | -4.52 | nnUAGn  | -5.42 | nnUAnn | -5.11 |
| GGUAUG                  | ↑      | 54 | -0.38                             | -0.29         | -0.08 | -1.06            | GnUAUG  | -1.89 | nnUAUG  | -2.67 | nnUAnG  | -4.08 | nnUAnn | -5.11 |
| GUUAAG                  | ↑      | 55 | -0.58                             | -0.50         | -0.08 | -1.64            | GUUAnG  | -2.69 | nUUAnG  | -3.55 | nUUAnn  | -4.26 | nnUAnn | -5.11 |
| GUUACC                  | ↑      | 53 | -0.40                             | -0.32         | -0.08 | -1.06            | GUUAnC  | -1.98 | GUUAnn  | -3.03 | nUUAnn  | -4.26 | nnUAnn | -5.11 |
| GCUAAA                  | ↑      | 53 | -0.23                             | -0.19         | -0.05 | -0.69            | GCUAAAn | -1.81 | GCUAnn  | -2.91 | nCUAnn  | -4.45 | nnUAnn | -5.11 |
| GCUAGU                  | ↑      | 58 | -0.71                             | -0.68         | -0.04 | -2.10            | GCUAGn  | -3.08 | nCUAGn  | -4.52 | nnUAGn  | -5.42 | nnUAnn | -5.11 |
| CUUAAC                  | ↑      | 58 | -0.54                             | -0.51         | -0.03 | -1.52            | CUUAAn  | -2.41 | CUUAnn  | -3.68 | nUUAnn  | -4.26 | nnUAnn | -5.11 |
| UCUAGC                  | ↑      | 59 | -0.79                             | -0.76         | -0.03 | -2.32            | nCUAGC  | -3.82 | nCUAGn  | -4.52 | nnUAGn  | -5.42 | nnUAnn | -5.11 |
| ACUAAC                  | ↑      | 57 | -0.49                             | -0.47         | -0.02 | -1.40            | ACUAnC  | -2.06 | ACUAnn  | -3.03 | nCUAnn  | -4.45 | nnUAnn | -5.11 |
| CCUACC                  | ↑      | 54 | -0.51                             | -0.50         | -0.02 | -1.46            | CCUAnC  | -2.23 | CCUAnn  | -3.03 | nCUAnn  | -4.45 | nnUAnn | -5.11 |
| GCUAUA                  | ↑      | 51 | -0.36                             | -0.35         | -0.01 | -1.00            | GCUAUAn | -1.81 | GCUAnn  | -2.91 | nCUAnn  | -4.45 | nnUAnn | -5.11 |
| UUUAAG                  | ↑      | 51 | -0.51                             | -0.54         | 0.02  | -1.46            | nUUAAG  | -2.69 | nUUAnG  | -3.55 | nUUAnn  | -4.26 | nnUAnn | -5.11 |
| CUUAAU                  | ↑      | 54 | -0.43                             | -0.46         | 0.03  | -1.22            | CUUAAn  | -2.41 | CUUAnn  | -3.68 | nUUAnn  | -4.26 | nnUAnn | -5.11 |
| GCUAGC                  | ↑      | 67 | -0.92                             | -0.97         | 0.05  | -2.70            | nCUAGC  | -3.82 | nCUAGn  | -4.52 | nnUAGn  | -5.42 | nnUAnn | -5.11 |
| GCUAAC                  | ↑      | 54 | -0.45                             | -0.53         | 0.07  | -1.28            | GCUAnC  | -2.06 | nCUAnC  | -3.03 | nCUAnn  | -4.45 | nnUAnn | -5.11 |

type 1 nnUAnn (continues)

| 1..2↓<br>codon<br>pairs | strand | %  | 6mers, log <sub>2</sub> (obs/exp) |               | A - B | z-score, ORFeome |        |       |        |       |        |       |        |       |  |
|-------------------------|--------|----|-----------------------------------|---------------|-------|------------------|--------|-------|--------|-------|--------|-------|--------|-------|--|
|                         |        |    | ORFeome<br>(A)                    | genome<br>(B) |       | 6mers            | 5mers  |       | 4mers  |       | 3mers  |       | 2mers  |       |  |
| GGUAUA                  |        | 51 | -0.30                             | -0.38         | 0.08  | -0.84            | GnUAUA | -1.19 | GGUAnn | -1.87 | GnUAnn | -3.02 | nnUAnn | -5.11 |  |
| GGUACC                  |        | 67 | -0.74                             | -0.83         | 0.10  | -2.10            | nGUACC | -2.32 | nGUACn | -2.20 | GnUAnn | -3.02 | nnUAnn | -5.11 |  |
| CCUAGU                  | ↔      | 51 | -0.74                             | -0.84         | 0.10  | -2.10            | CCUAGn | -3.08 | nCUAGn | -4.52 | nnUAGn | -5.42 | nnUAnn | -5.11 |  |
| CUUAAA                  | ↔      | 54 | -0.43                             | -0.54         | 0.10  | -1.22            | CUUAAn | -2.41 | CUUAnn | -3.68 | nUUAnn | -4.26 | nnUAnn | -5.11 |  |
| GCUAAG                  | ↔      | 61 | -0.54                             | -0.68         | 0.14  | -1.52            | GCUAnG | -2.69 | nCUAnG | -3.95 | nCUAnn | -4.45 | nnUAnn | -5.11 |  |
| CUUACA                  | ←      | 54 | -0.49                             | -0.64         | 0.14  | -1.40            | CUUACn | -2.50 | CUUAnn | -3.68 | nUUAnn | -4.26 | nnUAnn | -5.11 |  |
| CCUAGC                  | ↔      | 61 | -0.92                             | -1.06         | 0.14  | -2.70            | nCUAGC | -3.82 | nCUAGn | -4.52 | nnUAGn | -5.42 | nnUAnn | -5.11 |  |
| CGUAAG                  | →      | 51 | -0.51                             | -0.66         | 0.15  | -1.46            | CGUAnG | -2.32 | CnUAnG | -3.68 | nnUAnG | -4.08 | nnUAnn | -5.11 |  |
| CUUAAG                  | ↔      | 64 | -0.79                             | -0.98         | 0.19  | -2.25            | CUUAnG | -3.71 | CUUAnn | -3.68 | nUUAnn | -4.26 | nnUAnn | -5.11 |  |
| CCUAAC                  | ↔      | 52 | -0.47                             | -0.67         | 0.19  | -1.34            | CCUAnC | -2.23 | CCUAnn | -3.03 | nCUAnn | -4.45 | nnUAnn | -5.11 |  |
| UCUAAG                  | ↔      | 57 | -0.62                             | -0.88         | 0.26  | -1.77            | UCUAnG | -2.32 | nCUAnG | -3.95 | nCUAnn | -4.45 | nnUAnn | -5.11 |  |
| ACUAAG                  | ↔      | 56 | -0.56                             | -0.86         | 0.30  | -1.58            | ACUAnG | -2.69 | nCUAnG | -3.95 | nCUAnn | -4.45 | nnUAnn | -5.11 |  |
| CCUAAG                  | ↔      | 59 | -0.56                             | -0.98         | 0.42  | -1.58            | CCUAnG | -2.78 | nCUAnG | -3.95 | nCUAnn | -4.45 | nnUAnn | -5.11 |  |

|           |   | %     |
|-----------|---|-------|
| none      |   | 4.29  |
| sense     | → | 12.86 |
| antisense | ← | 28.57 |
| both      | ↔ | 54.29 |

type 2 nnGnnC

| 1..2↓<br>codon<br>pairs | %  | 6mers, log <sub>2</sub> (obs/exp) |            | A - B | z-score, ORFeome |        |       |        |       |        |       |        |       |
|-------------------------|----|-----------------------------------|------------|-------|------------------|--------|-------|--------|-------|--------|-------|--------|-------|
|                         |    | ORFeome<br>(A)                    | genome (B) |       | 6mers            | 5mers  |       | 4mers  |       | 3mers  |       | 2mers  |       |
| AGGUAC                  | 51 | -0.84                             | -0.06      | -0.77 | -2.39            | AGGUnC | -2.69 | nGGUnC | -2.79 | nGGnnC | -2.69 | nnGnnC | -2.53 |
| UCGUAC                  | 56 | -0.89                             | -0.29      | -0.60 | -2.62            | nCGUAC | -3.38 | nCGUAn | -3.29 | nCGUnn | -2.69 | nnGnnC | -2.53 |
| ACGUAC                  | 62 | -0.86                             | -0.27      | -0.59 | -2.47            | nCGUAC | -3.38 | nCGUAn | -3.29 | nCGUnn | -2.69 | nnGnnC | -2.53 |
| GCGUAC                  | 63 | -0.89                             | -0.30      | -0.59 | -2.54            | nCGUAC | -3.38 | nCGUAn | -3.29 | nCGUnn | -2.69 | nnGnnC | -2.53 |
| GGGAAC                  | 57 | -0.60                             | -0.02      | -0.58 | -1.70            | GGGAnC | -2.32 | GGGnnC | -2.67 | nGGnnC | -2.69 | nnGnnC | -2.53 |
| GGGUAC                  | 71 | -0.84                             | -0.32      | -0.52 | -2.70            | GGGUnC | -2.78 | nGGUnC | -2.79 | nGGnnC | -2.69 | nnGnnC | -2.53 |
| UUGGAC                  | 64 | -0.74                             | -0.29      | -0.45 | -2.10            | UUGGnC | -2.32 | UnGGnC | -2.09 | nnGGnC | -2.52 | nnGnnC | -2.53 |
| GUGUAC                  | 64 | -0.76                             | -0.32      | -0.44 | -2.17            | GnGUAC | -2.32 | nnGUAC | -2.55 | nnGUAn | -2.36 | nnGnnC | -2.53 |
| GCGUCC                  | 56 | -0.81                             | -0.38      | -0.43 | -2.39            | GnGUCC | -2.88 | nCGUnC | -2.91 | nnGUCn | -3.02 | nnGnnC | -2.53 |
| GCGGCC                  | 54 | -0.40                             | 0.02       | -0.42 | -1.06            | GnGGCC | -1.98 | GnGnCC | -2.55 | nnGnCC | -2.52 | nnGnnC | -2.53 |
| CCGUAC                  | 54 | -0.64                             | -0.23      | -0.41 | -1.77            | nCGUAC | -3.38 | nCGUAn | -3.29 | nCGUnn | -2.69 | nnGnnC | -2.53 |
| GCGGGC                  | 54 | -0.43                             | -0.03      | -0.40 | -1.22            | nCGGGC | -1.65 | GnGGGn | -2.20 | nnGGnC | -2.52 | nnGnnC | -2.53 |
| ACGGCC                  | 51 | -0.42                             | -0.02      | -0.40 | -1.11            | nCGGCC | -1.81 | nnGGCC | -2.43 | nnGnCC | -2.52 | nnGnnC | -2.53 |
| UUGUAC                  | 60 | -0.58                             | -0.22      | -0.35 | -1.64            | UnGUAC | -1.98 | nnGUAC | -2.55 | nnGUAn | -2.36 | nnGnnC | -2.53 |
| ACGGGC                  | 52 | -0.47                             | -0.13      | -0.34 | -1.34            | nCGGGC | -1.65 | nCGGnC | -1.65 | nnGGnC | -2.52 | nnGnnC | -2.53 |
| UUGGCC                  | 64 | -0.60                             | -0.26      | -0.34 | -1.64            | UUGGnC | -2.32 | nnGGCC | -2.43 | nnGnCC | -2.52 | nnGnnC | -2.53 |
| GUGGGC                  | 54 | -0.42                             | -0.13      | -0.29 | -1.17            | GnGGGC | -1.65 | GnGGGn | -2.20 | nnGGnC | -2.52 | nnGnnC | -2.53 |
| GUGGCC                  | 52 | -0.43                             | -0.20      | -0.23 | -1.22            | GnGGCC | -1.98 | GnGnCC | -2.55 | nnGnCC | -2.52 | nnGnnC | -2.53 |
| ACGGAC                  | 51 | -0.43                             | -0.23      | -0.20 | -1.22            | ACGnAC | -1.73 | nCGnAC | -2.55 | nnGGnC | -2.52 | nnGnnC | -2.53 |
| GGGUCC                  | 70 | -1.22                             | -1.02      | -0.20 | -3.59            | nGGUCC | -3.71 | nGGnCC | -3.41 | nnGUCn | -3.02 | nnGnnC | -2.53 |
| GAGGCC                  | 67 | -0.51                             | -0.33      | -0.19 | -1.46            | GnGGCC | -1.98 | GnGnCC | -2.55 | nnGnCC | -2.52 | nnGnnC | -2.53 |
| GGGAUC                  | 52 | -0.42                             | -0.26      | -0.16 | -1.11            | GGGAnC | -2.32 | GGGnnC | -2.67 | nGGnnC | -2.69 | nnGnnC | -2.53 |
| UUGGGC                  | 57 | -0.51                             | -0.37      | -0.14 | -1.40            | UUGGnC | -2.32 | UnGGnC | -2.09 | nnGGnC | -2.52 | nnGnnC | -2.53 |
| GGGACC                  | 66 | -0.97                             | -0.83      | -0.14 | -2.78            | GGGnCC | -3.08 | nGGnCC | -3.41 | nGGnnC | -2.69 | nnGnnC | -2.53 |
| GGGUUC                  | 58 | -0.42                             | -0.32      | -0.10 | -1.17            | GGGUnC | -2.78 | nGGUnC | -2.79 | nGGnnC | -2.69 | nnGnnC | -2.53 |
| GUGUCC                  | 55 | -0.67                             | -0.59      | -0.08 | -1.90            | GnGUCC | -2.88 | GnGUCn | -2.79 | nnGUCn | -3.02 | nnGnnC | -2.53 |
| GAGACC                  | 57 | -0.49                             | -0.42      | -0.07 | -1.40            | GAGnCC | -1.73 | GnGnCC | -2.55 | nnGnCC | -2.52 | nnGnnC | -2.53 |
| GAGGGC                  | 57 | -0.25                             | -0.18      | -0.07 | -0.69            | GnGGGC | -1.65 | GnGGGn | -2.20 | nnGGnC | -2.52 | nnGnnC | -2.53 |
| GGGGCC                  | 60 | -0.62                             | -0.60      | -0.03 | -1.77            | GGGnCC | -3.08 | nGGnCC | -3.41 | nGGnnC | -2.69 | nnGnnC | -2.53 |

type 3 nnCGCn

| 1..2↓<br>codon<br>pairs | %  | 6mers, log <sub>2</sub> (obs/exp) |            | A - B | z-score, ORFeome |        |       |        |       |        |       |        |       |
|-------------------------|----|-----------------------------------|------------|-------|------------------|--------|-------|--------|-------|--------|-------|--------|-------|
|                         |    | ORFeome<br>(A)                    | genome (B) |       | 6mers            | 5mers  |       | 4mers  |       | 3mers  |       | 2mers  |       |
| GCCGCG                  | 57 | -0.62                             | -0.08      | -0.54 | -1.70            | nCCGCG | -2.41 | nnCGCG | -3.41 | nnCGCn | -2.52 | nnCGnn | -1.81 |
| CUCGCG                  | 60 | -0.74                             | -0.36      | -0.38 | -2.17            | nUCGCG | -2.88 | nnCGCG | -3.41 | nnCGCn | -2.52 | nnCGnn | -1.81 |
| GUCGCG                  | 58 | -0.60                             | -0.22      | -0.38 | -1.70            | nUCGCG | -2.88 | nnCGCG | -3.41 | nnCGCn | -2.52 | nnCGnn | -1.81 |
| AUCGCG                  | 65 | -0.64                             | -0.29      | -0.34 | -1.83            | nUCGCG | -2.88 | nnCGCG | -3.41 | nnCGCn | -2.52 | nnCGnn | -1.81 |
| ACCGCG                  | 54 | -0.51                             | -0.18      | -0.34 | -1.46            | nCCGCG | -2.41 | nnCGCG | -3.41 | nnCGCn | -2.52 | nnCGnn | -1.81 |
| GACGCG                  | 64 | -0.56                             | -0.24      | -0.31 | -1.52            | nACGCG | -2.32 | nnCGCG | -3.41 | nnCGCn | -2.52 | nnCGnn | -1.81 |
| GACGCU                  | 51 | -0.30                             | 0.01       | -0.31 | -0.84            | GACGcn | -1.50 | nACGcn | -1.76 | nnCGCn | -2.52 | nnCGnn | -1.81 |
| UUCGCG                  | 72 | -0.84                             | -0.56      | -0.28 | -2.47            | UnCGCG | -2.88 | nnCGCG | -3.41 | nnCGCn | -2.52 | nnCGnn | -1.81 |
| AACGCG                  | 65 | -0.58                             | -0.31      | -0.27 | -1.64            | AnCGCG | -2.32 | nnCGCG | -3.41 | nnCGCn | -2.52 | nnCGnn | -1.81 |
| UCCGCG                  | 51 | -0.71                             | -0.44      | -0.27 | -2.03            | UnCGCG | -2.88 | nnCGCG | -3.41 | nnCGCn | -2.52 | nnCGnn | -1.81 |
| AGCGCG                  | 58 | -0.51                             | -0.29      | -0.23 | -1.46            | AnCGCG | -2.32 | nnCGCG | -3.41 | nnCGCn | -2.52 | nnCGnn | -1.81 |
| GACGCA                  | 70 | -0.51                             | -0.31      | -0.20 | -1.46            | nACGCA | -1.89 | nnCGCA | -2.09 | nnCGCn | -2.52 | nnCnnA | -2.04 |
| GGCGCC                  | 57 | -0.67                             | -0.52      | -0.15 | -1.90            | nGCGCC | -1.50 | nGCGCn | -1.98 | nnCGCn | -2.52 | nnCGnn | -1.81 |
| AACGCA                  | 67 | -0.47                             | -0.37      | -0.10 | -1.40            | nACGCA | -1.89 | nnCGCA | -2.09 | nnCGCn | -2.52 | nnCnnA | -2.04 |
| AUCGCA                  | 66 | -0.45                             | -0.46      | 0.00  | -1.22            | nUCGCA | -2.15 | nUCGnA | -2.43 | nnCGCn | -2.52 | nnCnnA | -2.04 |
| GUCGCA                  | 51 | -0.42                             | -0.44      | 0.02  | -1.17            | nUCGCA | -2.15 | nUCGnA | -2.43 | nnCGCn | -2.52 | nnCnnA | -2.04 |
| UACGCA                  | 55 | -0.43                             | -0.47      | 0.03  | -1.22            | UnCGCA | -2.15 | UnCGnA | -2.55 | nnCGCn | -2.52 | nnCnnA | -2.04 |
| CUCGCA                  | 57 | -0.43                             | -0.65      | 0.21  | -1.22            | nUCGCA | -2.15 | nUCGnA | -2.43 | nnCGCn | -2.52 | nnCnnA | -2.04 |

type 4 (G/C)UCCnn

| 1..2↓<br>codon<br>pairs | %  | 6mers, log <sub>2</sub> (obs/exp) |            | A - B | z-score, ORFeome |        |       |        |       |        |       |        |       |
|-------------------------|----|-----------------------------------|------------|-------|------------------|--------|-------|--------|-------|--------|-------|--------|-------|
|                         |    | ORFeome<br>(A)                    | genome (B) |       | 6mers            | 5mers  |       | 4mers  |       | 3mers  |       | 2mers  |       |
| CUCCAG                  | 51 | -0.58                             | 0.51       | -1.09 | -1.58            | CUCCnG | -2.88 | CUCCnn | -2.43 | nnCCnG | -1.58 | nnCnnG | -1.34 |
| CUCCCG                  | 51 | -0.97                             | -0.12      | -0.85 | -2.87            | CUCCnG | -2.88 | CUCCnn | -2.43 | nnCnCG | -2.04 | nnCnCn | -1.34 |
| GUCCUG                  | 51 | -0.64                             | 0.20       | -0.84 | -1.77            | GUCCnG | -2.15 | GUCCnn | -1.98 | nnCCnG | -1.58 | nnCnnG | -1.34 |
| CUCCUU                  | 51 | -0.43                             | 0.30       | -0.74 | -1.17            | CUCCUn | -1.98 | CUCCnn | -2.43 | nnCCUn | -1.43 | nnCCnn | -1.11 |
| GUCCAG                  | 53 | -0.40                             | 0.24       | -0.64 | -1.11            | GUCCnG | -2.15 | GUCCnn | -1.98 | nnCCnG | -1.58 | nnCnnG | -1.34 |
| CUCCAA                  | 56 | -0.45                             | 0.08       | -0.54 | -1.28            | CUCCnA | -2.32 | CUCCnn | -2.43 | nnCCnA | -2.20 | nnCnnA | -2.04 |
| GUCCCG                  | 52 | -0.71                             | -0.24      | -0.47 | -2.10            | GUCCnG | -2.15 | GUCCnn | -1.98 | nnCnCG | -2.04 | nnCnCn | -1.34 |
| CUCCGU                  | 52 | -0.67                             | -0.21      | -0.45 | -1.83            | CUCCGn | -2.23 | CUCCnn | -2.43 | CnCCnn | -1.28 | nnCCnn | -1.11 |
| CUCCCA                  | 62 | -0.74                             | -0.30      | -0.44 | -2.17            | CUCCnA | -2.32 | CUCCnn | -2.43 | nnCCnA | -2.20 | nnCnnA | -2.04 |
| GUCCUU                  | 54 | -0.40                             | 0.03       | -0.43 | -1.06            | GUCCUn | -1.73 | GUCCnn | -1.98 | nnCCUn | -1.43 | nnCCnn | -1.11 |
| GUCCUA                  | 51 | -0.60                             | -0.31      | -0.29 | -1.70            | GUCCnA | -2.23 | GUCCnn | -1.98 | nnCCnA | -2.20 | nnCnnA | -2.04 |
| CUCCCU                  | 51 | -0.45                             | -0.18      | -0.27 | -1.28            | CUCCcn | -2.23 | CUCCnn | -2.43 | nnCCCn | -1.73 | nnCnCn | -1.34 |
| GUCCCA                  | 62 | -0.60                             | -0.33      | -0.27 | -1.70            | GUCCnA | -2.23 | GUCCnn | -1.98 | nnCCnA | -2.20 | nnCnnA | -2.04 |
| GUCCAA                  | 57 | -0.51                             | -0.28      | -0.23 | -1.46            | GUCCnA | -2.23 | GUCCnn | -1.98 | nnCCnA | -2.20 | nnCnnA | -2.04 |

type 5 nnCnnA

| 1..2↓<br>codon<br>pairs | %  | 6mers, log <sub>2</sub> (obs/exp) |            | A - B | z-score, ORFeome |        |       |        |       |        |       |        |       |
|-------------------------|----|-----------------------------------|------------|-------|------------------|--------|-------|--------|-------|--------|-------|--------|-------|
|                         |    | ORFeome<br>(A)                    | genome (B) |       | 6mers            | 5mers  |       | 4mers  |       | 3mers  |       | 2mers  |       |
| GUCGUA                  | 53 | -0.40                             | 0.29       | -0.69 | -1.11            | nUCGUA | -1.89 | nUCGnA | -2.43 | nnCGnA | -2.36 | nnCnnA | -2.04 |
| GACGAA                  | 62 | -0.29                             | 0.23       | -0.51 | -0.79            | GACGnA | -1.42 | nACGnA | -1.76 | nnCGnA | -2.36 | nnCnnA | -2.04 |
| GUCGAA                  | 64 | -0.38                             | -0.10      | -0.28 | -1.00            | nUCGAA | -1.57 | nUCGnA | -2.43 | nnCGnA | -2.36 | nnCnnA | -2.04 |
| GGCCAA                  | 65 | -0.51                             | -0.24      | -0.27 | -1.46            | GGCCnA | -1.73 | GnCCnA | -1.87 | nnCCnA | -2.20 | nnCnnA | -2.04 |
| GGCAAA                  | 51 | -0.18                             | 0.07       | -0.26 | -0.50            | GGCnAA | -0.98 | GnCnAA | -1.03 | nnCnAA | -1.28 | nnCnnA | -2.04 |
| AUCGUA                  | 52 | -0.42                             | -0.24      | -0.17 | -1.11            | nUCGUA | -1.89 | nUCGnA | -2.43 | nnCGnA | -2.36 | nnCnnA | -2.04 |
| AUCGAA                  | 59 | -0.36                             | -0.28      | -0.08 | -1.00            | nUCGAA | -1.57 | nUCGnA | -2.43 | nnCGnA | -2.36 | nnCnnA | -2.04 |
| AUCCCA                  | 55 | -0.40                             | -0.35      | -0.05 | -1.11            | AnCCCA | -1.50 | nUCCnA | -1.98 | nnCCnA | -2.20 | nnCnnA | -2.04 |
| GUCUUA                  | 54 | -0.47                             | -0.43      | -0.04 | -1.34            | nUCUUA | -1.73 | nUCnUA | -1.87 | nUCnnA | -1.89 | nnCnnA | -2.04 |
| AUCCAA                  | 52 | -0.30                             | -0.33      | 0.02  | -0.84            | AUCCnA | -1.42 | nUCCnA | -1.98 | nnCCnA | -2.20 | nnCnnA | -2.04 |
| AUCCUA                  | 51 | -0.47                             | -0.51      | 0.04  | -1.40            | nUCCUA | -1.89 | nUCCnA | -1.98 | nnCCnA | -2.20 | nnCnnA | -2.04 |
| AUCUUA                  | 66 | -0.62                             | -0.68      | 0.06  | -1.77            | AUCnUA | -1.73 | nUCnUA | -1.87 | nUCnnA | -1.89 | nnCnnA | -2.04 |
| AUCGGA                  | 54 | -0.42                             | -0.62      | 0.21  | -1.17            | AUCGnA | -1.57 | nUCGnA | -2.43 | nnCGnA | -2.36 | nnCnnA | -2.04 |

type 6 UUCGnn

| 1..2↓<br>codon<br>pairs | %  | 6mers, log <sub>2</sub> (obs/exp) |            | A - B | z-score, ORFeome |        |       |        |       |        |       |        |       |
|-------------------------|----|-----------------------------------|------------|-------|------------------|--------|-------|--------|-------|--------|-------|--------|-------|
|                         |    | ORFeome<br>(A)                    | genome (B) |       | 6mers            | 5mers  |       | 4mers  |       | 3mers  |       | 2mers  |       |
| UUCGUG                  | 63 | -0.56                             | -0.27      | -0.28 | -1.58            | UUCGnG | -2.32 | nUCGnG | -2.55 | nnCGnG | -2.52 | nnCGnn | -1.81 |
| UUCGAG                  | 61 | -0.43                             | -0.17      | -0.27 | -1.22            | UUCGnG | -2.32 | nUCGnG | -2.55 | nnCGnG | -2.52 | nnCGnn | -1.81 |
| UUCGUA                  | 59 | -0.58                             | -0.36      | -0.22 | -1.64            | UUCGnA | -2.88 | UnCGnA | -2.55 | nnCGnA | -2.36 | nnCnnA | -2.04 |
| UUCGAU                  | 67 | -0.47                             | -0.28      | -0.19 | -1.34            | UUCGAn | -2.06 | UUCGnn | -2.43 | UnCGnn | -2.20 | nnCGnn | -1.81 |
| UUCGCU                  | 67 | -0.54                             | -0.44      | -0.09 | -1.52            | UUCGCn | -2.23 | UUCGnn | -2.43 | nnCGCn | -2.52 | nnCGnn | -1.81 |
| UUCGAA                  | 82 | -0.76                             | -0.75      | -0.01 | -2.25            | UUCGnA | -2.88 | UnCGnA | -2.55 | nnCGnA | -2.36 | nnCnnA | -2.04 |
| UUCGCA                  | 86 | -0.81                             | -0.86      | 0.05  | -2.32            | UUCGnA | -2.88 | UnCGnA | -2.55 | nnCGCn | -2.52 | nnCnnA | -2.04 |
| UUCGGA                  | 62 | -0.56                             | -0.70      | 0.14  | -1.58            | UUCGnA | -2.88 | UnCGnA | -2.55 | nnCGnA | -2.36 | nnCnnA | -2.04 |

type 7 nnGGnn

| 1..2↓<br>codon<br>pairs | %  | 6mers, log <sub>2</sub> (obs/exp) |            | A - B | z-score, ORFeome |        |       |        |       |        |       |        |       |
|-------------------------|----|-----------------------------------|------------|-------|------------------|--------|-------|--------|-------|--------|-------|--------|-------|
|                         |    | ORFeome<br>(A)                    | genome (B) |       | 6mers            | 5mers  |       | 4mers  |       | 3mers  |       | 2mers  |       |
| AAGGAG                  | 56 | -0.34                             | 0.30       | -0.64 | -0.90            | AnGGAG | -1.05 | nnGGAG | -1.44 | nnGGAn | -1.73 | nnGGnn | -1.34 |
| GAGGAA                  | 54 | -0.23                             | 0.37       | -0.60 | -0.64            | GnGGAA | -1.05 | GnGGAn | -1.54 | nnGGAn | -1.73 | nnGGnn | -1.34 |
| GUGGGU                  | 57 | -0.42                             | -0.18      | -0.24 | -1.11            | GnGGGU | -1.89 | nnGGGU | -2.20 | nnGGGn | -2.20 | nnGGnn | -1.34 |
| CUGGGU                  | 59 | -0.47                             | -0.27      | -0.20 | -1.34            | CnGGGU | -1.65 | nnGGGU | -2.20 | nnGGGn | -2.20 | nnGGnn | -1.34 |
| UUGGAA                  | 56 | -0.36                             | -0.16      | -0.20 | -1.00            | UUGGAn | -1.89 | UUGGnn | -1.87 | nnGGAn | -1.73 | nnGGnn | -1.34 |
| CAGGGU                  | 51 | -0.43                             | -0.24      | -0.19 | -1.22            | CnGGGU | -1.65 | nnGGGU | -2.20 | nnGGGn | -2.20 | nnGGnn | -1.34 |
| GAGGGU                  | 64 | -0.47                             | -0.30      | -0.18 | -1.28            | GnGGGU | -1.89 | nnGGGU | -2.20 | nnGGGn | -2.20 | nnGGnn | -1.34 |
| UUGGAU                  | 55 | -0.34                             | -0.33      | -0.01 | -0.95            | UUGGAn | -1.89 | UUGGnn | -1.87 | nnGGAn | -1.73 | nnGGnn | -1.34 |

**type 8 mononucleotide repeats**

| 1..2↓<br>codon<br>pairs | %  | 6mers, log <sub>2</sub> (obs/exp) |            | A - B | z-score, ORFeome |        |       |        |       |        |       |        |       |
|-------------------------|----|-----------------------------------|------------|-------|------------------|--------|-------|--------|-------|--------|-------|--------|-------|
|                         |    | ORFeome<br>(A)                    | genome (B) |       | 6mers            | 5mers  |       | 4mers  |       | 3mers  |       | 2mers  |       |
| GGGGGU                  | 83 | -1.12                             | -0.43      | -0.69 | -3.30            | GGGGGn | -3.49 | nnGGGU | -2.20 | nnGGGn | -2.20 | nnGGnn | -1.34 |
| UUUUUU                  | 64 | -0.15                             | 0.43       | -0.58 | -0.40            | UUnUUU | -0.44 | UUnUnU | -0.45 | UnnUnU | -0.55 | UnnnnU | -0.66 |
| GCCCCG                  | 51 | -0.60                             | -0.04      | -0.56 | -1.64            | nCCCCG | -2.41 | nCCCCn | -2.43 | nnCnCG | -2.04 | nnCnCn | -1.34 |
| GGGGGC                  | 68 | -0.79                             | -0.29      | -0.50 | -2.25            | GGGGGn | -3.49 | GGGnnc | -2.67 | nGGnnc | -2.69 | nnGnnc | -2.53 |
| GGGGGG                  | 53 | -0.58                             | -0.20      | -0.38 | -1.64            | GGGGGn | -3.49 | GnGGGn | -2.20 | nnGGGn | -2.20 | nnGGnn | -1.34 |
| ACCCCG                  | 54 | -0.58                             | -0.27      | -0.31 | -1.64            | nCCCCG | -2.41 | nCCCCn | -2.43 | nnCnCG | -2.04 | nnCnCn | -1.34 |
| ACCCCA                  | 51 | -0.45                             | -0.40      | -0.06 | -1.28            | ACCCcn | -1.98 | nCCCCn | -2.43 | nnCCnA | -2.20 | nnCnnA | -2.04 |
| GGGGCC                  | 60 | -0.62                             | -0.60      | -0.03 | -1.77            | GGGnCC | -3.08 | nGGnCC | -3.41 | nGGnnc | -2.69 | nnGnnc | -2.53 |

**type 9 nCAUAn**

| 1..2↓<br>codon<br>pairs | %  | 6mers, log <sub>2</sub> (obs/exp) |            | A - B | z-score, ORFeome |        |       |        |       |        |       |        |       |
|-------------------------|----|-----------------------------------|------------|-------|------------------|--------|-------|--------|-------|--------|-------|--------|-------|
|                         |    | ORFeome<br>(A)                    | genome (B) |       | 6mers            | 5mers  |       | 4mers  |       | 3mers  |       | 2mers  |       |
| UCAUAn                  | 59 | -0.58                             | -0.23      | -0.35 | -1.64            | UCAUAn | -2.32 | nCAUAn | -3.03 | UnnUAn | -0.84 | nnAnnU | -0.88 |
| UCAUAC                  | 51 | -0.58                             | -0.27      | -0.31 | -1.64            | UCAUAn | -2.32 | nCAUAn | -3.03 | nCAnnC | -0.98 | nCnnnC | -0.88 |
| GCAUAn                  | 59 | -0.51                             | -0.22      | -0.29 | -1.46            | nCAUAn | -2.06 | nCAUAn | -3.03 | nnAUAn | -0.84 | nnAnnU | -0.88 |
| GCAUAC                  | 59 | -0.47                             | -0.25      | -0.22 | -1.34            | GCAUAn | -2.06 | nCAUAn | -3.03 | nCAnnC | -0.98 | nCnnnC | -0.88 |
