# Supplementary material for: Preferred and avoided codon pairs in three domains of life
Source: PubMed Central journal article supplement (PMC2585594; doi:10.1186/1471-2164-9-463), 2008-10-08
Supplement: 1471-2164-9-463-S5.pdf [file 1471-2164-9-463-S5.pdf]

type 1 nnGCnn

| 1..2↑<br>codon<br>pairs | %  | 6mers, log <sub>2</sub> (obs/exp) |               | A - B | z-score, ORFeome |        |      |        |      |        |      |        |      |
|-------------------------|----|-----------------------------------|---------------|-------|------------------|--------|------|--------|------|--------|------|--------|------|
|                         |    | ORFs<br>(A)                       | genome<br>(B) |       | 6mers            | 5mers  |      | 4mers  |      | 3mers  |      | 2mers  |      |
| GGGCUU                  | 76 | 0.99                              | 0.44          | 0.55  | 3.45             | GGGcNu | 3.54 | GGGCnn | 4.11 | nnGCUn | 3.96 | nnGCnn | 4.31 |
| UUGCUn                  | 52 | 0.50                              | 0.04          | 0.46  | 1.58             | UUGCUn | 2.07 | nnGCUU | 2.66 | nnGCUn | 3.96 | nnGCnn | 4.31 |
| GGGCAG                  | 54 | 0.78                              | 0.33          | 0.45  | 2.48             | GGGCnG | 3.19 | GGGCnn | 4.11 | GnGCnn | 3.66 | nnGCnn | 4.31 |
| GGGCAU                  | 69 | 0.83                              | 0.39          | 0.44  | 2.73             | GGGcNu | 3.54 | GGGCnn | 4.11 | GnGCnn | 3.66 | nnGCnn | 4.31 |
| GGGCUG                  | 53 | 0.76                              | 0.32          | 0.44  | 2.41             | GGGCnG | 3.19 | GGGCnn | 4.11 | nnGCUn | 3.96 | nnGCnn | 4.31 |
| ACGCUU                  | 54 | 0.59                              | 0.15          | 0.43  | 1.89             | ACGCUn | 2.60 | nCGCUn | 3.17 | nnGCUn | 3.96 | nnGCnn | 4.31 |
| GGGCUA                  | 53 | 0.87                              | 0.51          | 0.35  | 2.89             | GGGcNA | 3.27 | GGGCnn | 4.11 | nnGCUn | 3.96 | nnGCnn | 4.31 |
| GGGCAA                  | 57 | 0.75                              | 0.51          | 0.25  | 2.38             | GGGcNA | 3.27 | GGGCnn | 4.11 | GnGCnn | 3.66 | nnGCnn | 4.31 |
| GAGCUU                  | 58 | 0.59                              | 0.35          | 0.24  | 1.92             | GnGCUU | 2.28 | GnGCUn | 2.98 | nnGCUn | 3.96 | nnGCnn | 4.31 |
| GCGCUU                  | 51 | 0.41                              | 0.19          | 0.22  | 1.28             | GnGCUU | 2.28 | nCGCUn | 3.17 | nnGCUn | 3.96 | nnGCnn | 4.31 |
| GAGCAU                  | 59 | 0.44                              | 0.23          | 0.21  | 1.40             | GAGcNu | 2.11 | GnGCnU | 2.79 | GnGCnn | 3.66 | nnGCnn | 4.31 |
| CUGCAA                  | 51 | 0.51                              | 0.34          | 0.17  | 1.61             | CnGCAA | 1.72 | CnGCnA | 2.25 | CnGCnn | 3.13 | nnGCnn | 4.31 |
| GAGCGU                  | 54 | 0.40                              | 0.43          | -0.03 | 1.28             | GAGcNu | 2.11 | GnGCnU | 2.79 | GnGCnn | 3.66 | nnGCnn | 4.31 |
| UUGCUG                  | 52 | 0.56                              | 0.60          | -0.04 | 1.81             | UUGCUn | 2.07 | nnGCUG | 2.72 | nnGCUn | 3.96 | nnGCnn | 4.31 |
| GAGCAA                  | 51 | 0.33                              | 0.38          | -0.05 | 1.05             | GAGcNA | 1.67 | GAGCnn | 2.52 | GnGCnn | 3.66 | nnGCnn | 4.31 |
| GAGCAG                  | 70 | 0.51                              | 0.64          | -0.13 | 1.61             | GAGcNG | 1.98 | GnGCnG | 2.98 | GnGCnn | 3.66 | nnGCnn | 4.31 |
| GUGCUG                  | 51 | 0.51                              | 0.75          | -0.24 | 1.64             | GnGCUG | 2.15 | GnGCUn | 2.98 | nnGCUn | 3.96 | nnGCnn | 4.31 |

type 2 nnCAnn

| 1..2↑<br>codon<br>pairs | %  | 6mers, log <sub>2</sub> (obs/exp) |               | A - B | z-score, ORFeome |        |      |        |      |        |      |        |      |
|-------------------------|----|-----------------------------------|---------------|-------|------------------|--------|------|--------|------|--------|------|--------|------|
|                         |    | ORFs<br>(A)                       | genome<br>(B) |       | 6mers            | 5mers  |      | 4mers  |      | 3mers  |      | 2mers  |      |
| GACAGC                  | 64 | 0.70                              | 0.21          | 0.49  | 2.28             | GACAGn | 2.24 | GnCAGn | 2.39 | nnCAGn | 2.36 | nnCAnn | 2.07 |
| CUCAAU                  | 53 | 0.62                              | 0.21          | 0.40  | 1.97             | CUCAAn | 1.76 | nnCAAU | 1.61 | nUCAnn | 1.77 | nnCAnn | 2.07 |
| GCCAAU                  | 54 | 0.44                              | 0.09          | 0.34  | 1.37             | nCCAAU | 1.67 | nCCAnU | 1.61 | nnCAAn | 1.77 | nnCAnn | 2.07 |
| ACCAAU                  | 51 | 0.33                              | 0.09          | 0.24  | 1.05             | nCCAAU | 1.67 | nCCAnU | 1.61 | nnCAAn | 1.77 | nnCAnn | 2.07 |
| AUCAUG                  | 54 | 0.22                              | 0.00          | 0.22  | 0.70             | AUCAUn | 0.84 | AUCAnn | 1.16 | nUCAnn | 1.77 | nnCAnn | 2.07 |
| UACAAC                  | 64 | 0.58                              | 0.36          | 0.22  | 1.87             | UACAnC | 1.85 | nACAnC | 1.83 | nnCANc | 2.13 | nnCAnn | 2.07 |
| GUCAAU                  | 61 | 0.52                              | 0.31          | 0.21  | 1.67             | GUCAnU | 1.67 | GUCAnn | 1.61 | nUCAnn | 1.77 | nnCAnn | 2.07 |
| AACAGC                  | 54 | 0.46                              | 0.53          | -0.08 | 1.46             | nACAGC | 2.15 | nACAGn | 2.12 | nnCAGn | 2.36 | nnCAnn | 2.07 |
| AUCAUC                  | 64 | 0.42                              | 0.53          | -0.11 | 1.31             | AUCAnC | 1.34 | nUCAnC | 1.90 | nnCANc | 2.13 | nnCAnn | 2.07 |
| AUCAAC                  | 52 | 0.30                              | 0.42          | -0.12 | 0.95             | nUCAAC | 1.39 | nUCAnC | 1.90 | nnCANc | 2.13 | nnCAnn | 2.07 |
| AUACCC                  | 53 | 0.28                              | 0.56          | -0.28 | 0.88             | AUCAnC | 1.34 | nUCAnC | 1.90 | nnCANc | 2.13 | nnCAnn | 2.07 |

type 3 nnUUnn

| 1..2↑<br>codon<br>pairs | %  | 6mers, log <sub>2</sub> (obs/exp) |               | A - B | z-score, ORFeome |        |      |        |      |        |      |        |      |
|-------------------------|----|-----------------------------------|---------------|-------|------------------|--------|------|--------|------|--------|------|--------|------|
|                         |    | ORFs<br>(A)                       | genome<br>(B) |       | 6mers            | 5mers  |      | 4mers  |      | 3mers  |      | 2mers  |      |
| CUUUC                   | 54 | 0.87                              | 0.18          | 0.69  | 2.89             | CUUUCn | 2.87 | CnUUcn | 3.10 | nnUUCn | 3.86 | nnUUnn | 2.84 |
| CUUUCU                  | 61 | 0.91                              | 0.29          | 0.61  | 3.06             | CUUUCn | 2.87 | nnUUcU | 3.35 | nnUUCn | 3.86 | nnUUnn | 2.84 |
| CUUUCA                  | 59 | 0.74                              | 0.15          | 0.59  | 2.36             | CUUUCn | 2.87 | nnUUcA | 3.53 | nnUUcA | 4.06 | nnUUnn | 2.84 |
| CCUUCU                  | 51 | 0.98                              | 0.69          | 0.29  | 3.32             | nCUUCU | 4.14 | nCUUCn | 3.82 | nnUUCn | 3.86 | nnUUnn | 2.84 |
| CUUUAU                  | 56 | 0.65                              | 0.37          | 0.28  | 2.00             | CUUUAn | 2.48 | CUUUnn | 2.32 | CnUUnn | 2.47 | nnUUnn | 2.84 |
| GCUUCU                  | 55 | 0.89                              | 0.62          | 0.27  | 2.93             | nCUUCU | 4.14 | nCUUCn | 3.82 | nnUUCn | 3.86 | nnUUnn | 2.84 |
| CUUUAC                  | 54 | 0.56                              | 0.32          | 0.25  | 1.81             | CUUUAn | 2.48 | CUUUnn | 2.32 | CnUUnn | 2.47 | nnUUnn | 2.84 |
| GCUUCA                  | 51 | 0.69                              | 0.44          | 0.24  | 2.23             | nCUUCA | 4.08 | nCUUnA | 3.99 | nnUUcA | 4.06 | nnUUnn | 2.84 |
| UCUUUCU                 | 57 | 1.19                              | 0.99          | 0.20  | 4.47             | nCUUCU | 4.14 | nCUUCn | 3.82 | nnUUCn | 3.86 | nnUUnn | 2.84 |

type 4 nnUnCn

| 1..2↑<br>codon<br>pairs | %  | 6mers, log <sub>2</sub> (obs/exp) |               | A - B | z-score, ORFeome |        |      |        |      |        |      |        |      |
|-------------------------|----|-----------------------------------|---------------|-------|------------------|--------|------|--------|------|--------|------|--------|------|
|                         |    | ORFs<br>(A)                       | genome<br>(B) |       | 6mers            | 5mers  |      | 4mers  |      | 3mers  |      | 2mers  |      |
| GGUUCU                  | 53 | 0.62                              | 0.17          | 0.46  | 1.97             | nGUUCU | 2.68 | nnUUCU | 3.35 | nnUUCn | 3.86 | nnUUnn | 2.84 |
| UUUGCC                  | 64 | 0.51                              | 0.07          | 0.44  | 1.61             | nUUGCC | 1.72 | nUUnCC | 1.98 | nnUGCn | 1.65 | nnUnCn | 2.07 |
| GUUGCU                  | 52 | 0.43                              | 0.24          | 0.18  | 1.34             | GUUnCU | 1.85 | nUUnCU | 2.05 | nnUnCU | 2.47 | nnUnCn | 2.07 |
| AAUGCC                  | 60 | 0.38                              | 0.24          | 0.15  | 1.21             | AnUGCC | 1.34 | nnUGCC | 1.69 | nnUGCn | 1.65 | nnUnCn | 2.07 |
| GAUGCC                  | 52 | 0.25                              | 0.18          | 0.07  | 0.81             | nAUGCC | 1.25 | nnUGCC | 1.69 | nnUGCn | 1.65 | nnUnCn | 2.07 |
| AUUGCC                  | 59 | 0.34                              | 0.29          | 0.05  | 1.08             | nUUGCC | 1.72 | nUUnCC | 1.98 | nnUGCn | 1.65 | nnUnCn | 2.07 |
| CCUGCU                  | 54 | 0.65                              | 0.72          | -0.06 | 2.05             | nCUGCU | 2.44 | nCUnCU | 3.29 | nnUnCU | 2.47 | nnUnCn | 2.07 |
| GCUUCU                  | 53 | 0.53                              | 0.68          | -0.15 | 1.67             | nCUGCU | 2.44 | nCUnCU | 3.29 | nnUnCU | 2.47 | nnUnCn | 2.07 |
