# Supplementary material for: Preferred and avoided codon pairs in three domains of life
Source: PubMed Central journal article supplement (PMC2585594; doi:10.1186/1471-2164-9-463), 2008-10-08
Supplement: 1471-2164-9-463-S6.pdf [file 1471-2164-9-463-S6.pdf]

**BACTERIA (Refseq 27.09.2006)**

Acidobacteria bacterium Ellin345  
Agrobacterium tumefaciens str. C58\_UWash  
Anabaena variabilis ATCC 29413  
Aquifex aeolicus VF5  
Bacillus anthracis str. Ames  
Bacillus anthracis str. Sterne  
Bacillus cereus ATCC 10987  
Bacillus cereus ATCC 14579  
Bacillus clausii KSM-K16  
Bacillus halodurans C-125  
Bacillus licheniformis ATCC 14580  
Bacteroides fragilis YCH46  
Bacteroides thetaiotaomicron VPI-5482  
Bartonella quintana str. Toulouse  
Bifidobacterium longum NCC2705  
Brucella abortus biovar 1 str. 9-941  
Brucella melitensis biovar Abortus 2308  
Buchnera aphidicola str. Sg  
Burkholderia pseudomallei 1710b  
Burkholderia pseudomallei K96243  
Burkholderia sp. 383  
Burkholderia thailandensis E264  
Burkholderia xenovorans LB400  
Campylobacter jejuni RM1221  
Campylobacter jejuni subsp. Jejuni NCTC 11168  
Candidatus blochmannia pennsylvanicus str. BPEN  
Chlamydia trachomatis D/UW-3/CX  
Chromobacterium violaceum ATCC 12472  
Chromohalobacter salexigens DSM 3043  
Corynebacterium glutamicum ATCC 13032  
Corynebacterium jeikeium K411  
Dechloromonas aromatica RCB  
Dehalococcoides ethenogens 195  
Ehrlichia canis str. Jake  
Escherichia coli K-12  
Francisella tularensis subsp. Tularensis FSC198  
Frankia alni ACN14a  
Fusobacterium nucleatum subsp. nucleatum ATCC 25586  
Haemophilus ducrey 35000HP  
Haemophilus influenzae 86-028NP  
Hahella chejuensis KCTC 2396  
Helicobacter hepaticus ATCC 51449  
Helicobacter pylori 26695  
Idiomarina loihiensis L2TR  
Jannaschia sp. CCS1  
Lactobacillus delbrueckii subsp. Bulgaricus ATCC 11842  
Lactobacillus sakei subsp. sakei 23K  
Legionella pneumophila str. Lens  
Legionella pneumophila str. Paris  
Leifsonia xyli subsp.xyli str. CTCB07  
Leptospira interrogans serovar Lai str.56601  
Magnetospirillum magneticum AMB-1  
Mesorhizobium loti MAFF303099

**Abbreviation****Accession no**

Abact NC\_008009  
Atume NC\_003304, NC\_003305  
Avari NC\_007413  
Aaeol NC\_000918  
Bant1 NC\_003997  
Bant2 NC\_005945  
Bcer1 NC\_003909  
Bcer2 NC\_004722  
Bclau NC\_006582  
Bhalo NC\_002570  
Blich NC\_006270  
Bfrag NC\_006347  
Bthet NC\_004663  
Bquin NC\_005955  
Blong NC\_004307  
Babor NC\_006932, NC\_006933  
Bmeli NC\_007618  
Baphi NC\_004061  
Bpse1 NC\_007434, NC\_007435  
Bpse2 NC\_006350, NC\_006351  
Burk NC\_007509, NC\_007510, NC\_007511  
Bthai NC\_007650, NC\_007651  
Bxeno NC\_007951, NC\_007952, NC\_007953  
Cjej1 NC\_003912  
Cjej2 NC\_002163  
Cbloc NC\_007292  
Ctrac NC\_000117  
Cviol NC\_005085  
Csale NC\_007963  
Cglut NC\_003450  
Cjeik NC\_007164  
Darom NC\_007298  
Dethe NC\_002936  
Ecani NC\_007354  
Ecoli NC\_000913  
Ftula NC\_008245  
Falni NC\_008278  
Fnucl NC\_003454  
Hducr NC\_002940  
Hinfl NC\_007146  
Hchej NC\_007645  
Hhepa NC\_004917  
Hpylo NC\_000915  
Iloih NC\_006512  
Janna NC\_007802  
Ldelb NC\_008054  
Lsake NC\_007576  
Lpne1 NC\_006369  
Lpne2 NC\_006368  
Lxyli NC\_006087  
Linte NC\_004342, NC\_004343  
Mmagn NC\_007626  
Mloti NC\_002678

**BACTERIA (Refseq 27.09.2006)**

|                                                                        | <b>Abbreviation</b> | <b>Accession no</b>  |
|------------------------------------------------------------------------|---------------------|----------------------|
| Mesorhizobium sp. BNC1                                                 | Meso                | NC_008254            |
| Methylococcus capsulatus str. Bath                                     | Mcaps               | NC_002977            |
| Mycoplasma capricolum subsp. Capricolum ATCC 27343                     | Mcapr               | NC_007633            |
| Mycoplasma hyopneumoniae 7448                                          | Mhyop               | NC_007332            |
| Mycoplasma penetrans HF-2                                              | Mpene               | NC_004432            |
| Mycoplasma pneumoniae M129                                             | Mpneu               | NC_000912            |
| Nitrobacter hamburgensis X14                                           | Mhamb               | NC_007964            |
| Pseudoalteromonas haloplanktis TAC125                                  | Phalo               | NC_007481, NC_007482 |
| Pseudomonas putida KT2440                                              | Pputi               | NC_002947            |
| Pseudomonas syringae pv. Syringae B728a                                | Psyr1               | NC_007005            |
| Pseudomonas syringae pv. tomato str. DC3000                            | Psyr2               | NC_004578            |
| Psychrobacter arcticus 273-4                                           | Parct               | NC_007204            |
| Rhodococcus sp. RHA1                                                   | Rhodo               | NC_008268            |
| Rhodoferax ferrireducens T118                                          | Rferr               | NC_007908            |
| Rhodopirellula baltica                                                 | Rbalt               | NC_005027            |
| Rhodopseudomonas palustris BisB18                                      | Rpalu               | NC_007925            |
| Rickettsia felis URRWXCa2                                              | Rfeli               | NC_007109            |
| Rickettsia typhi str. Wilmington                                       | Rtyph               | NC_006142            |
| Salmonella enterica subsp. enterica serovar Paratyphi A str. ATCC 9150 | Sente               | NC_006511            |
| Shigella flexneri 2a str. 2457T                                        | Sfle1               | NC_004741            |
| Shigella flexneri 2a str. 301                                          | Sfle2               | NC_004337            |
| Shigella sonnei Ss046                                                  | Ssonn               | NC_007384            |
| Sodalis glossinidus str. 'morsitans'                                   | Sglos               | NC_007712            |
| Staphylococcus aureus RF122                                            | Saur1               | NC_007622            |
| Staphylococcus aureus subsp. aureus 8325                               | Saur2               | NC_007795            |
| Staphylococcus aureus subsp. aureus MRSA252                            | Saur3               | NC_002952            |
| Staphylococcus aureus subsp. aureus N315                               | Saur4               | NC_002745            |
| Staphylococcus epidermidis ATCC 12228                                  | Sepi1               | NC_004461            |
| Staphylococcus epidermidis RP62A                                       | Sepi2               | NC_002976            |
| Staphylococcus saprophyticus subsp. saprophyticus ATCC 15305           | Ssapr               | NC_007350            |
| Streptococcus agalactiae A909                                          | Sagal               | NC_007432            |
| Streptococcus mutans UA 159                                            | Smuta               | NC_004350            |
| Streptococcus pyogenes MGAS10270                                       | Spyo1               | NC_008022            |
| Streptococcus pyogenes MGAS2096                                        | Spyo2               | NC_008023            |
| Streptococcus pyogenes MGAS5005                                        | Spyo3               | NC_007297            |
| Streptococcus pyogenes MGAS9429                                        | Spyo4               | NC_008021            |
| Synechococcus CC9311                                                   | Syne1               | NC_008319            |
| Synechococcus CC9605                                                   | Syne2               | NC_007516            |
| Synthrophus aciditrophicus SB                                          | Sacid1              | NC_007759            |
| Thermosynechococcus elongatus BP-1                                     | Telon               | NC_004113            |
| Thermotoga maritima MSB8                                               | Tmari               | NC_000853            |
| Thermus termophilus H27                                                | Tterm1              | NC_005835            |
| Thermus termophilus HB8                                                | Tterm2              | NC_006461            |
| Trichodesmium erythraeum IMS101                                        | Teryt               | NC_008312            |
| Vibrio fisheri ES114                                                   | Vfish               | NC_006840, NC_006841 |
| Vibrio vulnificus YJ016                                                | Vvuln               | NC_005139, NC_005140 |
| Xanthomonas campestris pv. vesicatoria str. 85-10                      | Xcamp               | NC_007508            |
| Xanthomonas oryzae pv. Oryzae MAFF 311018                              | Xoryz               | NC_007705            |
| Yersinia pestis CO92                                                   | Ypes1               | NC_003143            |
| Yersinia pestis Nepal516                                               | Ypes2               | NC_008149            |

**ARCHAEA (RefSeq 27.09.2006)**

Aeropyrum pernix K1  
Archaeoglobus fulgidus DSM 4304  
Haloarcula marismortui ATCC 43049  
Halobacterium sp. NRC-1  
Haloquadratum walsbyi DSM 16790  
Methanocaldococcus jannaschii DSM 2661  
Methanococcoides burtonii DSM 6242  
Methanococcus maripaludis S2  
Methanopyrus kandleri AV19  
Methanosarcina acetivorans C2A  
Methanosarcina barkeri str. fusaro  
Methanosarcina mazei Go1  
Methanosphaera stadtmanae DSM 3091  
Methanospirillum hungatei JF-1  
Methanothermobacter thermautotrophicus str. Delta H  
Nanoarchaeum equitans Kin4-M  
Natronomonas pharaonis DSM 2160  
Picrophilus torridus DSM 9790  
Pyrobaculum aerophilum str IM2  
Pyrococcus abyssi GE5  
Pyrococcus furiosus DSM 3638  
Pyrococcus horikoshii OT3  
Sulfolobus acidocaldarius DSM 639  
Sulfolobus solfataricus P2  
Sulfolobus tokodaii str. 7  
Thermococcus kodakarensis KOD1  
Thermoplasma acidophilum DSM 1728  
Thermoplasma volcanium GSS1

**Abbreviation****Accession no**

Apern NC\_000854  
Afulg NC\_000917  
Hmari NC\_006396, NC\_006397  
Halob NC\_002607  
Hwals NC\_008212  
Mjann NC\_000909  
Mburt NC\_007955  
Mmari NC\_005791  
Mkand NC\_003551  
Macet NC\_003552  
Mbark NC\_007355  
Mmaze NC\_003901  
Mstad NC\_007681  
Mhung NC\_007796  
Mther NC\_000916  
Nequi NC\_005213  
Nphar NC\_007426  
Ptorr NC\_005877  
Paero NC\_003364  
Pabys NC\_000868  
Pfuri NC\_003413  
Phori NC\_000961  
Sacid2 NC\_007181  
Ssolf NC\_002754  
Stoko NC\_003106  
Tkoda NC\_006624  
Tacid NC\_002578  
Tvolc NC\_002689

**EYKARYOTES (RefSeq 18.10.2006)****Abbreviation****Accession no**

|                                                             |       |                                                                                                                                                                                               |
|-------------------------------------------------------------|-------|-----------------------------------------------------------------------------------------------------------------------------------------------------------------------------------------------|
| <i>Candida glabrata</i>                                     | Cglab | NC_005967, NC_005968,<br>NC_006026, NC_006027, NC_006028,<br>NC_006029, NC_006030, NC_006031,<br>NC_006032, NC_006033, NC_006034,<br>NC_006035, NC_006036                                     |
| <i>Cryptococcus neoformans</i> var. <i>Neoformans</i> JEC21 | Cneof | NC_006670, NC_006679, NC_006680,<br>NC_006681, NC_006682, NC_006683,<br>NC_006684, NC_006685, NC_006686,<br>NC_006687, NC_006691, NC_006692,<br>NC_006693, NC_006694                          |
| <i>Homo sapiens</i> (ENSEMBL coding sequences 18.10.2006)   | Hsapi |                                                                                                                                                                                               |
| <i>Kluyveromyces lactis</i> NRRL Y-1440                     | Klact | NC_006037, NC_006038,<br>NC_006039, NC_006040,<br>NC_006041, NC_006042                                                                                                                        |
| <i>Saccharomyces cerevisiae</i> S288c                       | Scere | NC_001133, NC_001134, NC_001135,<br>NC_001136, NC_001137, NC_001138,<br>NC_001139, NC_001140, NC_001141,<br>NC_001142, NC_001143, NC_001144,<br>NC_001145, NC_001146, NC_001147,<br>NC_001148 |
| <i>Schizosaccharomyces pombe</i> 972h-                      | Spomb | NC_003421, NC_003423, NC_003424                                                                                                                                                               |
| <i>Yarrowia lipolytica</i>                                  | Ylipo | NC_006067, NC_006068,<br>NC_006069, NC_006070,<br>NC_006071, NC_006072                                                                                                                        |
